# Supplementary material for: Interleukin-25 is detrimental for recovery after spinal cord injury in mice
Source: PubMed Central journal article supplement (PMC4858907; doi:10.1186/s12974-016-0566-y), 2016-05-06

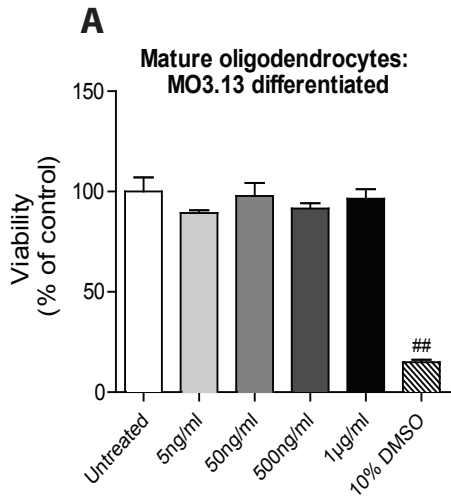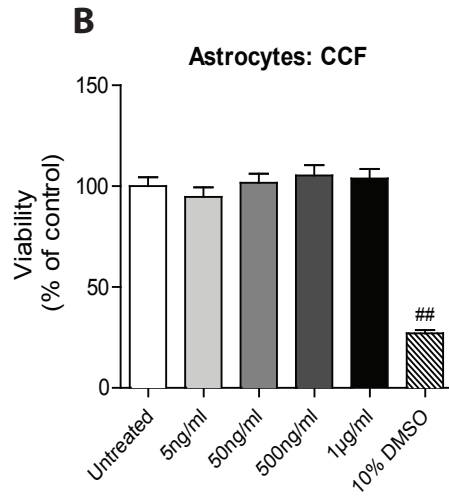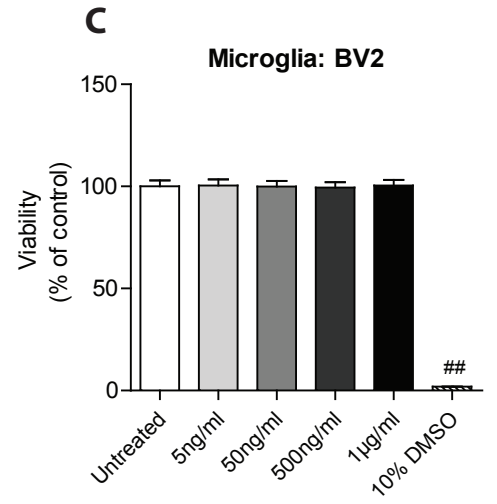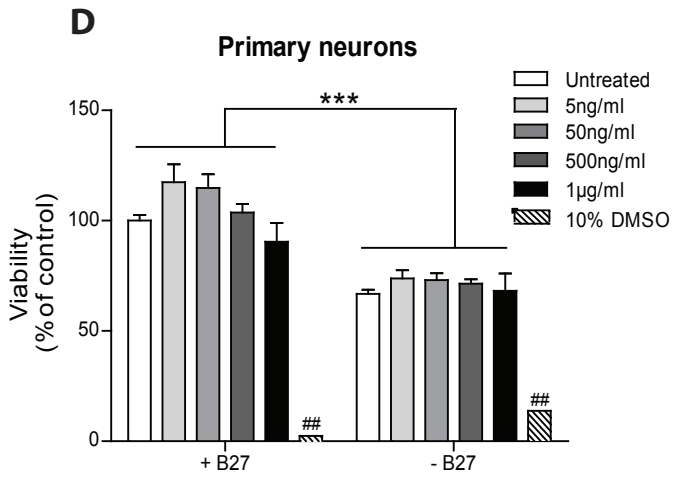

Supplement: 12974_2016_566_MOESM2_ESM.pdf [file 12974_2016_566_MOESM2_ESM.pdf]
